# Supplementary material for: Effects of melatonin on growth and antioxidant capacity of naked oat (Avena nuda L) seedlings under lead stress
Source: PeerJ journal article supplement (doi:10.7717/peerj.13978), 2022-08-30
Supplement: Chlorophyll_content.xlsx [file Chlorophyll_content.xlsx]

## Sheet: Sheet1
control	0.59
control	0.56
control	0.53
MT50	0.69
MT50	0.64
MT50	0.72
MT100	0.61
MT100	0.59
MT100	0.53
Pb	0.3
Pb	0.28
Pb	0.25
MT50+Pb	0.46
MT50+Pb	0.44
MT50+Pb	0.47
MT100+Pb	0.38
MT100+Pb	0.37
MT100+Pb	0.35
