# Supplementary material for: Effects of melatonin on growth and antioxidant capacity of naked oat (Avena nuda L) seedlings under lead stress
Source: PeerJ journal article supplement (doi:10.7717/peerj.13978), 2022-08-30
Supplement: Dry_weight.xlsx [file Dry_weight.xlsx]

## Sheet: Sheet1
control	0.28
control	0.24
control	0.27
MT50	0.26
MT50	0.27
MT50	0.28
MT100	0.27
MT100	0.25
MT100	0.26
Pb	0.15
Pb	0.14
Pb	0.16
MT50+Pb	0.18
MT50+Pb	0.2
MT50+Pb	0.17
MT100+Pb	0.2
MT100+Pb	0.21
MT100+Pb	0.21
