# Supplementary material for: Effects of melatonin on growth and antioxidant capacity of naked oat (Avena nuda L) seedlings under lead stress
Source: PeerJ journal article supplement (doi:10.7717/peerj.13978), 2022-08-30
Supplement: Fresh_weight.xlsx [file Fresh_weight.xlsx]

## Sheet: Sheet1
control	1.32
control	1.41
control	1.27
MT50	1.29
MT50	1.37
MT50	1.32
MT100	1.33
MT100	1.34
MT100	1.25
Pb	0.72
Pb	0.71
Pb	0.68
MT50+Pb	0.79
MT50+Pb	0.8
MT50+Pb	0.82
MT100+Pb	0.81
MT100+Pb	0.77
MT100+Pb	0.78
