# Supplementary material for: Effects of melatonin on growth and antioxidant capacity of naked oat (Avena nuda L) seedlings under lead stress
Source: PeerJ journal article supplement (doi:10.7717/peerj.13978), 2022-08-30
Supplement: H2O2_content.xlsx [file H2O2_content.xlsx]

## Sheet: Sheet1
control	36.02
control	33.4
control	31.71
MT50	39.99
MT50	37.19
MT50	34.54
MT100	37.16
MT100	33.68
MT100	35.53
Pb	61.4
Pb	73.24
Pb	75.24
MT50+Pb	44.47
MT50+Pb	53.83
MT50+Pb	47.87
MT100+Pb	48.87
MT100+Pb	58.6
MT100+Pb	48.54
