# Supplementary material for: Effects of melatonin on growth and antioxidant capacity of naked oat (Avena nuda L) seedlings under lead stress
Source: PeerJ journal article supplement (doi:10.7717/peerj.13978), 2022-08-30
Supplement: Lead_content.xlsx [file Lead_content.xlsx]

## Sheet: Sheet1
control	12
control	11
control	12
MT50	10
MT50	10
MT50	9
MT100	10
MT100	11
MT100	10
Pb	126
Pb	128
Pb	124
MT50+Pb	118
MT50+Pb	113
MT50+Pb	114
MT100+Pb	95
MT100+Pb	94
MT100+Pb	91
