# Supplementary material for: Effects of melatonin on growth and antioxidant capacity of naked oat (Avena nuda L) seedlings under lead stress
Source: PeerJ journal article supplement (doi:10.7717/peerj.13978), 2022-08-30
Supplement: MDA_content.xlsx [file MDA_content.xlsx]

## Sheet: Sheet1
1	0.73	control	0.73
1	0.61	control	0.61
1	0.84	control	0.84
2	0.82	MT50	0.82
2	0.75	MT50	0.75
2	0.93	MT50	0.93
3	0.7	MT100	0.7
3	0.84	MT100	0.84
3	0.91	MT100	0.91
4	2.81	Pb	2.81
4	3.38	Pb	3.38
4	2.98	Pb	2.98
5	1.99	MT50+Pb	1.99
5	1.46	MT50+Pb	1.46
5	1.78	MT50+Pb	1.78
6	1.77	MT100+Pb	1.77
6	2.26	MT100+Pb	2.26
6	1.98	MT100+Pb	1.98
