# Supplementary material for: Effects of melatonin on growth and antioxidant capacity of naked oat (Avena nuda L) seedlings under lead stress
Source: PeerJ journal article supplement (doi:10.7717/peerj.13978), 2022-08-30
Supplement: O2__content.xlsx [file O2__content.xlsx]

## Sheet: Sheet1
control	101.81
control	103.61
control	107.33
MT50	95.1
MT50	97.91
MT50	103.43
MT100	118.69
MT100	129.22
MT100	123.12
Pb	193.68
Pb	174.14
Pb	191.43
MT50+Pb	143.52
MT50+Pb	138.62
MT50+Pb	133.23
MT100+Pb	147.77
MT100+Pb	132.86
MT100+Pb	140.27
