# Supplementary material for: Effects of melatonin on growth and antioxidant capacity of naked oat (Avena nuda L) seedlings under lead stress
Source: PeerJ journal article supplement (doi:10.7717/peerj.13978), 2022-08-30
Supplement: Plant_height.xlsx [file Plant_height.xlsx]

## Sheet: Sheet1
control	23.79
control	23.34
control	21.21
MT50	24.55
MT50	24.78
MT50	24.21
MT100	24.67
MT100	23.21
MT100	25.46
Pb	14.47
Pb	12.11
Pb	15.6
MT50+Pb	16.69
MT50+Pb	16.22
MT50+Pb	17.13
MT100+Pb	17.74
MT100+Pb	17.89
MT100+Pb	18.28
