# Supplementary material for: Effects of melatonin on growth and antioxidant capacity of naked oat (Avena nuda L) seedlings under lead stress
Source: PeerJ journal article supplement (doi:10.7717/peerj.13978), 2022-08-30
Supplement: Proline_Content.xlsx [file Proline_Content.xlsx]

## Sheet: Sheet1
control	72.04
control	77.69
control	74.25
MT50	98.12
MT50	98.92
MT50	97.34
MT100	92.47
MT100	94.27
MT100	91.5
Pb	117.33
Pb	120.27
Pb	118.64
MT50+Pb	147.94
MT50+Pb	154.28
MT50+Pb	144.32
MT100+Pb	144.27
MT100+Pb	136.59
MT100+Pb	145.78
