# Supplementary material for: Effects of melatonin on growth and antioxidant capacity of naked oat (Avena nuda L) seedlings under lead stress
Source: PeerJ journal article supplement (doi:10.7717/peerj.13978), 2022-08-30
Supplement: Relative_Asmap1_expression_level.xlsx [file Relative_Asmap1_expression_level.xlsx]

## Sheet: Sheet1
control	1.81
control	1.67
control	1.76
MT50	1.73
MT50	1.68
MT50	1.87
MT100	2.43
MT100	2.69
MT100	2.37
Pb	2.44
Pb	2.53
Pb	2.34
MT50+Pb	9.05
MT50+Pb	8.92
MT50+Pb	9.24
MT100+Pb	7.69
MT100+Pb	7.91
MT100+Pb	8.73
