# Supplementary material for: Effects of melatonin on growth and antioxidant capacity of naked oat (Avena nuda L) seedlings under lead stress
Source: PeerJ journal article supplement (doi:10.7717/peerj.13978), 2022-08-30
Supplement: Relative_LOX_expression_level.xlsx [file Relative_LOX_expression_level.xlsx]

## Sheet: Sheet1
control	17.35
control	10.77
control	20.39
MT50	94.26
MT50	80.23
MT50	83.28
MT100	97.33
MT100	92.57
MT100	89.32
Pb	37.83
Pb	42.76
Pb	30.55
MT50+Pb	119.73
MT50+Pb	114.68
MT50+Pb	114.93
MT100+Pb	139.27
MT100+Pb	130.55
MT100+Pb	132.87
