# Supplementary material for: Effects of melatonin on growth and antioxidant capacity of naked oat (Avena nuda L) seedlings under lead stress
Source: PeerJ journal article supplement (doi:10.7717/peerj.13978), 2022-08-30
Supplement: Relative_POX_expression_level.xlsx [file Relative_POX_expression_level.xlsx]

## Sheet: Sheet1
control	1.21
control	0.98
control	1.33
MT50	1.22
MT50	1.09
MT50	1.42
MT100	1.47
MT100	1.24
MT100	1.11
Pb	1.51
Pb	1.58
Pb	1.37
MT50+Pb	3.31
MT50+Pb	3.09
MT50+Pb	3.71
MT100+Pb	3.65
MT100+Pb	3.59
MT100+Pb	3.21
