# Supplementary material for: Effects of melatonin on growth and antioxidant capacity of naked oat (Avena nuda L) seedlings under lead stress
Source: PeerJ journal article supplement (doi:10.7717/peerj.13978), 2022-08-30
Supplement: Relative_WRKY1_expression_level.xlsx [file Relative_WRKY1_expression_level.xlsx]

## Sheet: Sheet1
control	1.2
control	1.23
control	0.93
MT50	1.46
MT50	1.21
MT50	1.36
MT100	2.47
MT100	2.51
MT100	2.29
Pb	3.15
Pb	3.24
Pb	3.78
MT50+Pb	3.3
MT50+Pb	3.45
MT50+Pb	3.95
MT100+Pb	5.35
MT100+Pb	5.42
MT100+Pb	6.13
