# Supplementary material for: Effects of melatonin on growth and antioxidant capacity of naked oat (Avena nuda L) seedlings under lead stress
Source: PeerJ journal article supplement (doi:10.7717/peerj.13978), 2022-08-30
Supplement: SOD_activity.xlsx [file SOD_activity.xlsx]

## Sheet: Sheet1
control	28.03
control	31.67
control	30.78
MT50	59.55
MT50	60.61
MT50	46.35
MT100	56.09
MT100	58.73
MT100	44.86
Pb	36.94
Pb	40.33
Pb	35.86
MT50+Pb	53.62
MT50+Pb	54.04
MT50+Pb	41.62
MT100+Pb	54.91
MT100+Pb	50.08
MT100+Pb	40.06
