# Supplementary material for: Effects of melatonin on growth and antioxidant capacity of naked oat (Avena nuda L) seedlings under lead stress
Source: PeerJ journal article supplement (doi:10.7717/peerj.13978), 2022-08-30
Supplement: Soluble_protein_content.xlsx [file Soluble_protein_content.xlsx]

## Sheet: Sheet1
control	14.14
control	15.79
control	14.56
MT50	15.76
MT50	14.88
MT50	14.76
MT100	16.25
MT100	15.22
MT100	15.37
Pb	7.05
Pb	5.53
Pb	5.72
MT50+Pb	13.09
MT50+Pb	11.28
MT50+Pb	12.11
MT100+Pb	11.97
MT100+Pb	11.86
MT100+Pb	12.21
